# Supplementary material for: Efficacy of Cord Blood Cell Therapy for Hutchinson–Gilford Progeria Syndrome—A Case Report
Source: MDPI journal article supplement (doi:10.3390/ijms222212316), 2021-11-15
Supplement: s1 [file s1]

**Table S1.** General information of infused cord blood units

|                                         | 1 <sup>st</sup> procedure | 2 <sup>nd</sup> procedure | 3 <sup>rd</sup> procedure |
|-----------------------------------------|---------------------------|---------------------------|---------------------------|
| Date of procedure                       | May 2019                  | September 2019            | January 2020              |
| No. of infused CB                       | 1 unit                    | 1 unit                    | 1 unit                    |
| Total infused volume                    | 27 mL                     | 21.5 mL                   | 22 mL                     |
| Pre-thawing TNC (/kg)                   | $4.27 \times 10^7$        | $3.05 \times 10^7$        | $3.59 \times 10^7$        |
| Post-thawing TNC (/kg)                  | $3.61 \times 10^7$        | $2.52 \times 10^7$        | $3.30 \times 10^7$        |
| Cell viability (CD34+ cell)             | 96%                       | 88%                       | 82%                       |
| % of CD34+ cell                         | 0.49                      | 0.15                      | 0.05                      |
| Absolute number of CD34+ cells/ $\mu$ l | 101                       | 28                        | 12                        |
| Blood type                              | B+                        | B+                        | B+                        |
| Immune compatibility*                   |                           |                           |                           |
| Low resolution level                    | Full match                | Full match                | Full match                |
| High resolution level                   | 3 mismatch                | 3 mismatch                | 3 mismatch                |

\*Immune compatibility was checked by human leukocyte antigen -A, B, and DRB1, which was fully matched at low resolution level and half matched at high resolution level at each of three infusions.

Abbreviation: CB, cord blood; TNC, total nucleated cell.
