# Supplementary material for: Efficacy of Cord Blood Cell Therapy for Hutchinson–Gilford Progeria Syndrome—A Case Report
Source: MDPI journal article supplement (doi:10.3390/ijms222212316), 2021-11-15
Supplement: s1 [file s1]

**Table S3.** Range of motion in joints before and after the cord blood cell therapy

| Joint     | Motion Range                        | Before first infusion |             | 1 year after first infusion |             |
|-----------|-------------------------------------|-----------------------|-------------|-----------------------------|-------------|
|           |                                     | Right                 | Left        | Right                       | Left        |
| Shoulder  | Flexion-Extension                   | 240°                  | <b>230°</b> | 240°                        | <b>240°</b> |
|           | Abduction-Adduction                 | 210°                  | <b>200°</b> | 210°                        | <b>210°</b> |
|           | External rotation-Internal Rotation | 180°                  | 180°        | 180°                        | 180°        |
| Elbow     | Flexion-Extension                   | <b>130°</b>           | <b>130°</b> | <b>140°</b>                 | <b>140°</b> |
| Wrist     | Flexion-Extension                   | 95°                   | 90°         | 90°                         | 90°         |
| Thumb     | Flexion-Extension (MP)              | 5°                    | <b>10°</b>  | 0°                          | <b>0°</b>   |
|           | Flexion-Extension (PIP)             | 90°                   | 90°         | 90°                         | 90°         |
| 3rd digit | Flexion-Extension (MP)              | 100°                  | 110°        | 100°                        | 110°        |
|           | Flexion-Extension (PIP)             | 90°                   | 90°         | 90°                         | 90°         |
|           | Flexion-Extension (DIP)             | 70°                   | 70°         | 70°                         | 70°         |
| Hip       | Flexion-Extension                   | 117°                  | 113°        | 100°                        | 100°        |
|           | Abduction-Adduction                 | 60°                   | 60°         | 60°                         | 60°         |
|           | External rotation-Internal Rotation | 45°                   | 40°         | 40°                         | 40°         |
| Knee      | Flexion-Extension                   | <b>70°</b>            | <b>75°</b>  | <b>60°</b>                  | <b>60°</b>  |
| Ankle     | Dorsiflexion-Plantar flexion        | <b>40°</b>            | 30°         | <b>25°</b>                  | 25°         |
| Toe       | Flexion-Extension (MP)              | 30°                   | 30°         | 30°                         | 30°         |

The motion range that changed more than 10° at 1 year after therapy are shown in bold prints. The motion range were evaluated right before and one year after the first infusion of cord blood cells. Abbreviations: MP, Metacarpophalangeal; PIP, Proximal interphalangeal; DIP, Distal interphalangeal
