# Supplementary material for: Efficacy of Cord Blood Cell Therapy for Hutchinson–Gilford Progeria Syndrome—A Case Report
Source: MDPI journal article supplement (doi:10.3390/ijms222212316), 2021-11-15
Supplement: s1 [file s1]

**Table S2. Gene specific primers and amplification cycling conditions for PCR**

| Gene          | Prime sequences(5'-3')                                                               | Product length (bp) | Amplification cycling conditions (denaturation/annealing/extension) | Total cycles |
|---------------|--------------------------------------------------------------------------------------|---------------------|---------------------------------------------------------------------|--------------|
| IL-1 $\beta$  | Sense: AAACAGATGAAGTGCTCCTTCCAGG<br>Antisense: TGGAGAACACCAACTTGTTGCTCCA             | 391                 | 95°C, 30 sec / 62°C, 30 sec / 72°C, 30 sec                          | 35           |
| TNF- $\alpha$ | Sense: GAGTGACAACCCTGTAGCCCATGTTGTAGCA<br>Antisense: GCAATGATCCCAAAGTAGACCTGCCCAGACT | 444                 | 95°C, 30 sec / 68°C, 30 sec / 72°C, 30 sec                          | 35           |
| CRP           | Sense: TCCTCGACCCGTGGGTACAG<br>Antisense: ACCAGGGACTGGCTTCCTTC                       | 329                 | 95°C, 30 sec / 62°C, 30 sec / 72°C, 30 sec                          | 35           |
| IL-8          | Sense: ATGACTTCCAAGCTGGCCGTGGCT<br>Antisense: TCTCAGCCCTCTTCAAAAATTCTC               | 292                 | 95°C, 30 sec / 66°C, 30 sec / 72°C, 30 sec                          | 35           |
| TLR-4         | Sense: CGGAGGCCATTATGCTATGT<br>Antisense: TCCCTTCCTCCTTTTCCCTA                       | 141                 | 95°C, 30 sec / 56°C, 30 sec / 72°C, 30 sec                          | 35           |
| ICAM1         | Sense: CCCCACAACCTGTCAGCCCC<br>Antisense: GCTCTAGGGTGGGCCTCACA                       | 361                 | 95°C, 30 sec / 62°C, 30 sec / 72°C, 30 sec                          | 35           |
| MCPI          | Sense: AGCATGAAAGTCTCTGCCGCC<br>Antisense: GTCCAGGTGGTCCATGGAATC                     | 276                 | 95°C, 30 sec / 68°C, 30 sec / 72°C, 30 sec                          | 35           |
| 18s           | Sense: GTAACCCGTTGAACCCCAT<br>Antisense: CCATCCAATCGGTAGTAGCG                        | 151                 | 95°C, 30 sec / 58°C, 30 sec / 72°C, 30 sec                          | 35           |
